# Supplementary material for: Research themes of family and community physicians in Brazil
Source: bioRxiv or medRxiv preprint supplement (doi:10.1101/2021.12.22.21268269), 2021-12-24
Supplement: Supplementary file [file media-1.pdf]

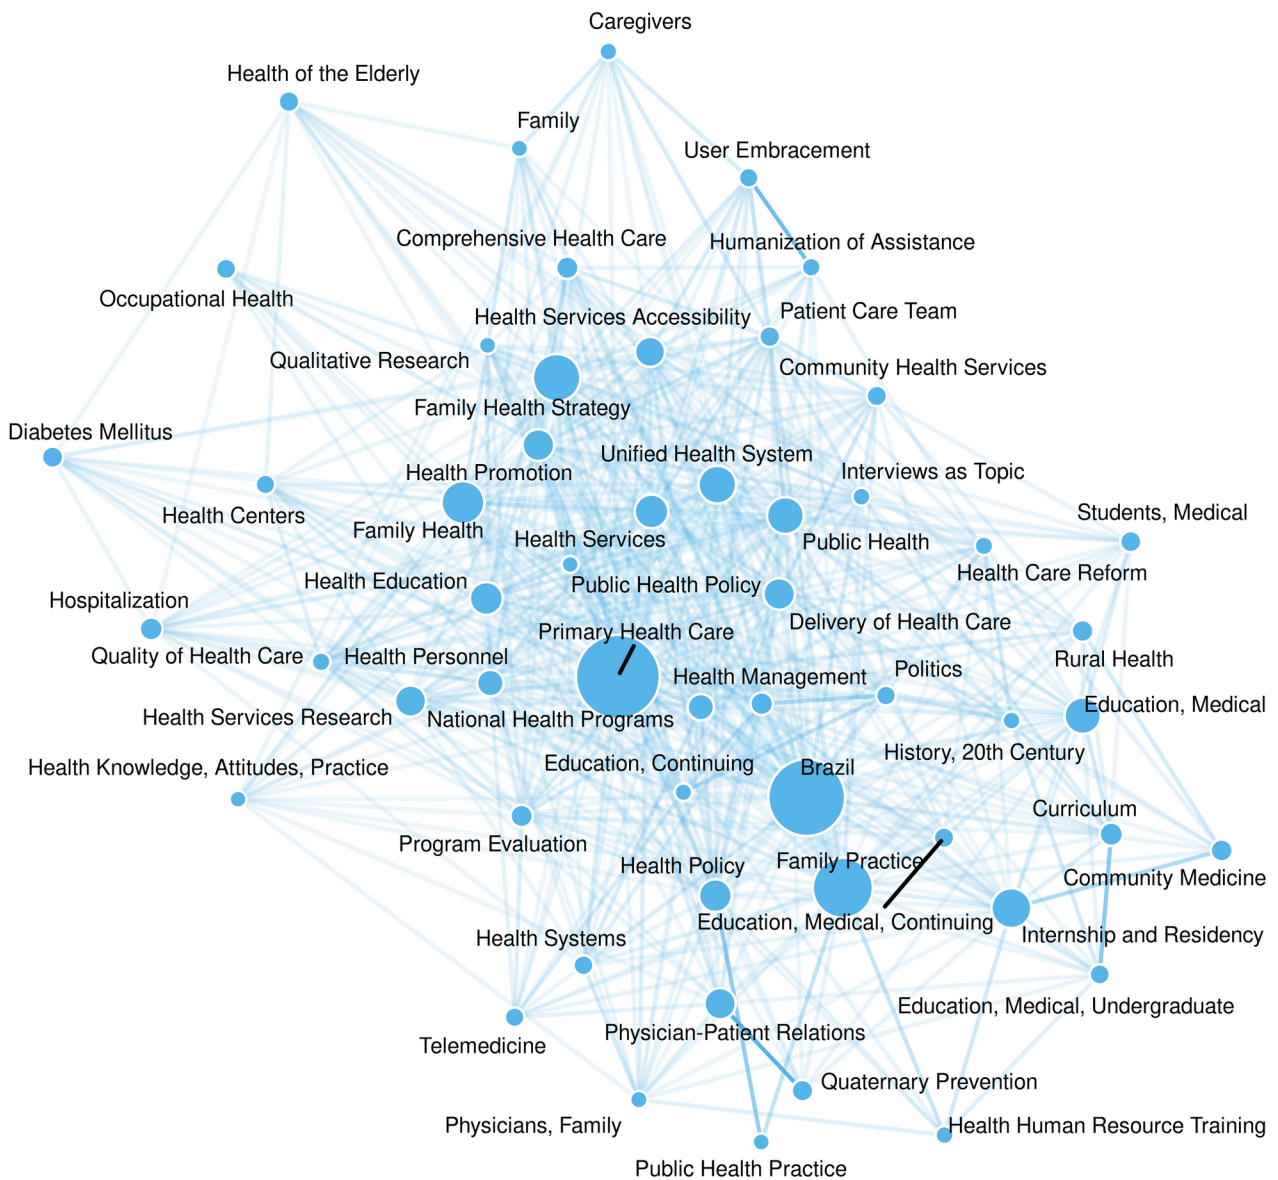

**Research themes** • Primary Health Care

*Suppl. Figure 2 – Diagram of keyword co-occurrence for the most common keywords, amounting to two thirds in the "primary health care" theme. Bubble sizes and edges' opacity are proportional to weighted frequency.*



Suppl. Table 1 – Characteristics of the research themes of family and community physicians in Brazil, up to 2018

| ID | Name *                         | Articles |          | Authorship weight (mean) | Keywords per article (mean) | Keywords |          | Centrality | Density |
|----|--------------------------------|----------|----------|--------------------------|-----------------------------|----------|----------|------------|---------|
|    |                                | unique   | weighted |                          |                             | unique   | weighted |            |         |
| 1  | Humans                         | 1005     | 271.1    | 27.0%                    | 10.4                        | 744      | 242.7    | 4776.3     | 36.4    |
| 2  | Primary Health Care            | 419      | 194.5    | 46.4%                    | 5.5                         | 586      | 226.0    | 2302.1     | 33.1    |
| 3  | Animals                        | 156      | 27.2     | 17.4%                    | 12.4                        | 625      | 31.5     | 3329.3     | 12.4    |
| 4  | Malaria, Vivax                 | 34       | 4.0      | 11.7%                    | 15.9                        | 120      | 4.5      | 992.9      | 9.4     |
| 5  | Sensitivity and Specificity    | 17       | 5.0      | 29.4%                    | 10.1                        | 41       | 3.2      | 365.5      | 8.2     |
| 6  | Severity of Illness Index      | 14       | 2.1      | 15.2%                    | 10.5                        | 69       | 4.4      | 560.2      | 7.5     |
| 7  | Influenza, Human               | 13       | 3.4      | 26.3%                    | 8.6                         | 16       | 1.4      | 134.9      | 13.5    |
| 8  | Educational Measurement        | 12       | 3.3      | 27.6%                    | 10.2                        | 9        | 1.0      | 30.4       | 15.2    |
| 9  | Zika Virus                     | 3        | 1.7      | 56.8%                    | 4.4                         | 11       | 2.3      | 95.9       | 13.0    |
| 10 | Breast Feeding                 | 13       | 2.5      | 19.2%                    | 8.1                         | 13       | 1.4      | 59.0       | 14.3    |
| 11 | Accidental Falls               | 5        | 1.0      | 20.3%                    | 7.9                         | 11       | 1.0      | 57.4       | 4.2     |
| 12 | Drug Utilization               | 4        | 1.0      | 25.3%                    | 8.2                         | 12       | 0.9      | 71.2       | 5.6     |
| 13 | Dementia                       | 0        | 0.0      |                          |                             | 17       | 1.7      | 54.2       | 0.0     |
| 14 |                                | 5        | 1.7      | 33.4%                    | 10.7                        | 0        | 0.0      | 0.0        | 0.0     |
| 15 | Referral and Consultation      | 2        | 1.1      | 52.8%                    | 5.2                         | 17       | 0.5      | 59.6       | 2.9     |
| 16 | Practice Patterns, Physicians' | 0        | 0.0      |                          |                             | 12       | 1.5      | 49.0       | 0.0     |
| 17 | Evidence-Based Medicine        | 0        | 0.0      |                          |                             | 11       | 1.5      | 81.5       | 0.0     |
| 18 | Community Health Workers       | 0        | 0.0      |                          |                             | 10       | 1.5      | 63.4       | 0.0     |
| 19 | Episode of Care                | 0        | 0.0      |                          |                             | 15       | 1.4      | 132.9      | 0.0     |
| 20 | Ethics, Clinical               | 0        | 0.0      |                          |                             | 16       | 1.4      | 215.5      | 0.0     |
| 21 | Time Factors                   | 0        | 0.0      |                          |                             | 17       | 1.3      | 197.9      | 0.0     |

| ID | Name *                                | Articles |          | Authorship<br>weight (mean) | Keywords per<br>article (mean) | Keywords |          | Centrality | Density |
|----|---------------------------------------|----------|----------|-----------------------------|--------------------------------|----------|----------|------------|---------|
|    |                                       | unique   | weighted |                             |                                | unique   | weighted |            |         |
| 22 | HIV                                   | 0        | 0.0      |                             |                                | 9        | 1.3      | 36.4       | 0.0     |
| 23 | Quality of Life                       | 0        | 0.0      |                             |                                | 8        | 1.3      | 60.7       | 0.0     |
| 24 |                                       | 4        | 1.3      | 32.3%                       | 5.2                            | 0        | 0.0      | 0.0        | 0.0     |
| 25 | Aging                                 | 0        | 0.0      |                             |                                | 8        | 1.3      | 31.5       | 0.0     |
| 26 | Dental Caries                         | 0        | 0.0      |                             |                                | 10       | 1.2      | 52.8       | 0.0     |
| 27 | Disease Outbreaks                     | 0        | 0.0      |                             |                                | 13       | 1.2      | 133.4      | 0.0     |
| 28 | Urban Population                      | 0        | 0.0      |                             |                                | 11       | 1.2      | 69.2       | 0.0     |
| 29 | Students                              | 0        | 0.0      |                             |                                | 9        | 1.2      | 56.0       | 0.0     |
| 30 |                                       | 4        | 1.2      | 28.9%                       | 23.3                           | 0        | 0.0      | 0.0        | 0.0     |
| 31 |                                       | 3        | 1.1      | 37.6%                       | 7.7                            | 0        | 0.0      | 0.0        | 0.0     |
| 32 | Frail Elderly                         | 0        | 0.0      |                             |                                | 6        | 1.1      | 45.5       | 0.0     |
| 33 | Developing Countries                  | 0        | 0.0      |                             |                                | 15       | 1.1      | 109.9      | 0.0     |
| 34 |                                       | 5        | 1.0      | 20.8%                       | 14.5                           | 0        | 0.0      | 0.0        | 0.0     |
| 35 | Practice Guidelines as Topic          | 1        | 0.3      | 27.6%                       | 9.0                            | 8        | 0.7      | 45.0       | 6.2     |
| 36 |                                       | 1        | 1.0      | 100.0%                      | 7.0                            | 0        | 0.0      | 0.0        | 0.0     |
| 37 |                                       | 1        | 1.0      | 100.0%                      | 6.0                            | 0        | 0.0      | 0.0        | 0.0     |
| 38 |                                       | 1        | 1.0      | 100.0%                      | 13.0                           | 0        | 0.0      | 0.0        | 0.0     |
| 39 |                                       | 1        | 1.0      | 100.0%                      | 9.0                            | 0        | 0.0      | 0.0        | 0.0     |
| 40 | Attitude of Health Personnel          | 0        | 0.0      |                             |                                | 24       | 0.9      | 178.3      | 0.0     |
| 41 | Antiretroviral Therapy, Highly Active | 0        | 0.0      |                             |                                | 21       | 0.9      | 269.0      | 0.0     |
| 42 | Health Surveys                        | 0        | 0.0      |                             |                                | 11       | 0.9      | 99.7       | 0.0     |
| 43 | Trust                                 | 3        | 0.5      | 17.5%                       | 16.2                           | 16       | 0.4      | 165.4      | 3.0     |

| ID | Name *                                   | Articles |          | Authorship<br>weight (mean) | Keywords per<br>article (mean) | Keywords |          | Centrality | Density |
|----|------------------------------------------|----------|----------|-----------------------------|--------------------------------|----------|----------|------------|---------|
|    |                                          | unique   | weighted |                             |                                | unique   | weighted |            |         |
| 44 | Coinfection                              | 0        | 0.0      |                             |                                | 8        | 0.9      | 71.2       | 0.0     |
| 45 | Diet                                     | 0        | 0.0      |                             |                                | 10       | 0.9      | 133.5      | 0.0     |
| 46 | Models, Statistical                      | 0        | 0.0      |                             |                                | 12       | 0.9      | 108.1      | 0.0     |
| 47 | Epidemiology, Descriptive                | 1        | 0.4      | 36.0%                       | 8.0                            | 6        | 0.5      | 50.7       | 5.4     |
| 48 | Infant Mortality                         | 0        | 0.0      |                             |                                | 9        | 0.9      | 54.5       | 0.0     |
| 49 |                                          | 3        | 0.9      | 28.9%                       | 5.9                            | 0        | 0.0      | 0.0        | 0.0     |
| 50 |                                          | 2        | 0.9      | 43.0%                       | 9.4                            | 0        | 0.0      | 0.0        | 0.0     |
| 51 | Automobile Driving                       | 0        | 0.0      |                             |                                | 18       | 0.8      | 144.2      | 0.0     |
| 52 | Patient Compliance                       | 0        | 0.0      |                             |                                | 18       | 0.8      | 178.3      | 0.0     |
| 53 | Liver Cirrhosis                          | 0        | 0.0      |                             |                                | 13       | 0.8      | 167.4      | 0.0     |
| 54 |                                          | 1        | 0.8      | 81.8%                       | 8.0                            | 0        | 0.0      | 0.0        | 0.0     |
| 55 |                                          | 4        | 0.8      | 20.3%                       | 17.8                           | 0        | 0.0      | 0.0        | 0.0     |
| 56 | Employee Performance Appraisal           | 0        | 0.0      |                             |                                | 12       | 0.8      | 99.2       | 0.0     |
| 57 | Depression, Postpartum                   | 0        | 0.0      |                             |                                | 13       | 0.8      | 135.9      | 0.0     |
| 58 | Substance-Related Disorders              | 0        | 0.0      |                             |                                | 8        | 0.8      | 73.6       | 0.0     |
| 59 | Blood Pressure Monitoring,<br>Ambulatory | 0        | 0.0      |                             |                                | 12       | 0.8      | 136.7      | 0.0     |
| 60 | Incidence                                | 0        | 0.0      |                             |                                | 25       | 0.8      | 219.0      | 0.0     |
| 61 | Self Concept                             | 0        | 0.0      |                             |                                | 9        | 0.8      | 54.7       | 0.0     |
| 62 |                                          | 1        | 0.8      | 76.7%                       | 12.0                           | 0        | 0.0      | 0.0        | 0.0     |
| 63 |                                          | 3        | 0.8      | 25.2%                       | 18.4                           | 0        | 0.0      | 0.0        | 0.0     |
| 64 | Chagas Cardiomyopathy                    | 0        | 0.0      |                             |                                | 26       | 0.8      | 216.2      | 0.0     |
| 65 | Inflammation                             | 1        | 0.1      | 6.4%                        | 15.0                           | 27       | 0.7      | 392.4      | 2.1     |

| ID | Name *                     | Articles |          | Authorship<br>weight (mean) | Keywords per<br>article (mean) | Keywords |          | Centrality | Density |
|----|----------------------------|----------|----------|-----------------------------|--------------------------------|----------|----------|------------|---------|
|    |                            | unique   | weighted |                             |                                | unique   | weighted |            |         |
|    | AIDS-Related Opportunistic |          |          |                             |                                |          |          |            |         |
| 66 | Infections                 | 1        | 0.1      | 13.6%                       | 18.0                           | 13       | 0.6      | 144.8      | 3.6     |
| 67 | Consensus                  | 0        | 0.0      |                             |                                | 12       | 0.7      | 124.9      | 0.0     |
| 68 | Epidemiologic Methods      | 0        | 0.0      |                             |                                | 13       | 0.7      | 102.4      | 0.0     |
| 69 |                            | 2        | 0.7      | 34.4%                       | 12.5                           | 0        | 0.0      | 0.0        | 0.0     |
| 70 | Translations               | 0        | 0.0      |                             |                                | 16       | 0.7      | 130.5      | 0.0     |
| 71 | Cluster Analysis           | 0        | 0.0      |                             |                                | 22       | 0.7      | 209.3      | 0.0     |
| 72 | Body Constitution          | 1        | 0.5      | 50.0%                       | 6.0                            | 2        | 0.2      | 0.5        | 11.1    |
| 73 |                            | 2        | 0.7      | 33.3%                       | 12.5                           | 0        | 0.0      | 0.0        | 0.0     |
| 74 |                            | 2        | 0.7      | 33.0%                       | 8.0                            | 0        | 0.0      | 0.0        | 0.0     |
| 75 |                            | 3        | 0.6      | 21.1%                       | 5.6                            | 0        | 0.0      | 0.0        | 0.0     |
| 76 | Acute Kidney Injury        | 1        | 0.1      | 10.2%                       | 14.0                           | 25       | 0.5      | 249.9      | 2.5     |
| 77 | Antimalarials              | 0        | 0.0      |                             |                                | 16       | 0.6      | 115.7      | 0.0     |
| 78 |                            | 4        | 0.6      | 15.2%                       | 14.5                           | 0        | 0.0      | 0.0        | 0.0     |
| 79 | Child Abuse                | 0        | 0.0      |                             |                                | 9        | 0.6      | 36.7       | 0.0     |
| 80 | House Calls                | 1        | 0.4      | 36.0%                       | 9.0                            | 2        | 0.2      | 7.6        | 7.4     |
| 81 | Tomography, X-Ray Computed | 0        | 0.0      |                             |                                | 13       | 0.6      | 103.8      | 0.0     |
| 82 | Parents                    | 0        | 0.0      |                             |                                | 6        | 0.6      | 54.0       | 0.0     |
| 83 | Acute Coronary Syndrome    | 1        | 0.4      | 40.9%                       | 8.0                            | 2        | 0.2      | 7.8        | 8.3     |
| 84 |                            | 1        | 0.6      | 56.2%                       | 11.0                           | 0        | 0.0      | 0.0        | 0.0     |
| 85 |                            | 2        | 0.6      | 27.6%                       | 9.4                            | 0        | 0.0      | 0.0        | 0.0     |
| 86 | Recurrence                 | 0        | 0.0      |                             |                                | 9        | 0.6      | 70.7       | 0.0     |
| 87 |                            | 1        | 0.5      | 54.4%                       | 14.0                           | 0        | 0.0      | 0.0        | 0.0     |

| ID  | Name *                 | Articles |          | Authorship weight (mean) | Keywords per article (mean) | Keywords |          | Centrality | Density |
|-----|------------------------|----------|----------|--------------------------|-----------------------------|----------|----------|------------|---------|
|     |                        | unique   | weighted |                          |                             | unique   | weighted |            |         |
| 88  | Consumer Behavior      | 0        | 0.0      |                          |                             | 10       | 0.5      | 84.4       | 0.0     |
| 89  |                        | 1        | 0.5      | 52.0%                    | 10.0                        | 0        | 0.0      | 0.0        | 0.0     |
| 90  | Integrality in Health  | 0        | 0.0      |                          |                             | 4        | 0.5      | 18.0       | 0.0     |
| 91  | Diabetes Complications | 0        | 0.0      |                          |                             | 12       | 0.5      | 49.7       | 0.0     |
| 92  | Bodily Secretions      | 1        | 0.4      | 36.0%                    | 15.0                        | 6        | 0.1      | 5.6        | 5.7     |
| 93  | Survival Rate          | 0        | 0.0      |                          |                             | 12       | 0.5      | 84.3       | 0.0     |
| 94  |                        | 1        | 0.5      | 50.0%                    | 14.0                        | 0        | 0.0      | 0.0        | 0.0     |
| 95  |                        | 1        | 0.5      | 50.0%                    | 7.0                         | 0        | 0.0      | 0.0        | 0.0     |
| 96  |                        | 1        | 0.5      | 50.0%                    | 7.0                         | 0        | 0.0      | 0.0        | 0.0     |
| 97  |                        | 1        | 0.5      | 50.0%                    | 8.0                         | 0        | 0.0      | 0.0        | 0.0     |
| 98  |                        | 1        | 0.5      | 50.0%                    | 9.0                         | 0        | 0.0      | 0.0        | 0.0     |
| 99  |                        | 1        | 0.5      | 50.0%                    | 13.0                        | 0        | 0.0      | 0.0        | 0.0     |
| 100 |                        | 1        | 0.5      | 50.0%                    | 6.0                         | 0        | 0.0      | 0.0        | 0.0     |
| 101 |                        | 1        | 0.5      | 50.0%                    | 13.0                        | 0        | 0.0      | 0.0        | 0.0     |
| 102 |                        | 1        | 0.5      | 50.0%                    | 11.0                        | 0        | 0.0      | 0.0        | 0.0     |
| 103 |                        | 1        | 0.5      | 50.0%                    | 11.0                        | 0        | 0.0      | 0.0        | 0.0     |
| 104 |                        | 1        | 0.5      | 50.0%                    | 6.0                         | 0        | 0.0      | 0.0        | 0.0     |
| 105 |                        | 1        | 0.5      | 50.0%                    | 11.0                        | 0        | 0.0      | 0.0        | 0.0     |
| 106 |                        | 1        | 0.5      | 50.0%                    | 8.0                         | 0        | 0.0      | 0.0        | 0.0     |
| 107 | Neurofibromatosis 1    | 0        | 0.0      |                          |                             | 21       | 0.5      | 165.1      | 0.0     |
| 108 |                        | 1        | 0.5      | 48.0%                    | 12.0                        | 0        | 0.0      | 0.0        | 0.0     |
| 109 | Acute Disease          | 0        | 0.0      |                          |                             | 13       | 0.5      | 122.1      | 0.0     |



| ID  | Name *                  | Articles |          | Authorship<br>weight (mean) | Keywords per<br>article (mean) | Keywords |          | Centrality | Density |
|-----|-------------------------|----------|----------|-----------------------------|--------------------------------|----------|----------|------------|---------|
|     |                         | unique   | weighted |                             |                                | unique   | weighted |            |         |
| 110 |                         | 1        | 0.5      | 47.4%                       | 13.0                           | 0        | 0.0      | 0.0        | 0.0     |
| 111 | Geography               | 0        | 0.0      |                             |                                | 12       | 0.4      | 74.1       | 0.0     |
| 112 |                         | 1        | 0.4      | 44.2%                       | 12.0                           | 0        | 0.0      | 0.0        | 0.0     |
| 113 | Coronary Artery Disease | 0        | 0.0      |                             |                                | 18       | 0.4      | 162.5      | 0.0     |
| 114 |                         | 1        | 0.4      | 43.8%                       | 8.0                            | 0        | 0.0      | 0.0        | 0.0     |
| 115 |                         | 2        | 0.4      | 21.8%                       | 7.7                            | 0        | 0.0      | 0.0        | 0.0     |
| 116 | Population Surveillance | 0        | 0.0      |                             |                                | 3        | 0.4      | 19.8       | 0.0     |
| 117 |                         | 1        | 0.4      | 40.9%                       | 11.0                           | 0        | 0.0      | 0.0        | 0.0     |
| 118 |                         | 1        | 0.4      | 40.9%                       | 5.0                            | 0        | 0.0      | 0.0        | 0.0     |
| 119 |                         | 1        | 0.4      | 40.9%                       | 7.0                            | 0        | 0.0      | 0.0        | 0.0     |
| 120 |                         | 1        | 0.4      | 40.9%                       | 4.0                            | 0        | 0.0      | 0.0        | 0.0     |
| 121 |                         | 1        | 0.4      | 40.9%                       | 8.0                            | 0        | 0.0      | 0.0        | 0.0     |
| 122 |                         | 1        | 0.4      | 40.9%                       | 8.0                            | 0        | 0.0      | 0.0        | 0.0     |
| 123 |                         | 1        | 0.4      | 40.9%                       | 8.0                            | 0        | 0.0      | 0.0        | 0.0     |
| 124 |                         | 1        | 0.4      | 40.9%                       | 22.0                           | 0        | 0.0      | 0.0        | 0.0     |
| 125 |                         | 1        | 0.4      | 40.9%                       | 9.0                            | 0        | 0.0      | 0.0        | 0.0     |
| 126 |                         | 1        | 0.4      | 40.9%                       | 7.0                            | 0        | 0.0      | 0.0        | 0.0     |
| 127 |                         | 1        | 0.4      | 40.9%                       | 14.0                           | 0        | 0.0      | 0.0        | 0.0     |
| 128 |                         | 1        | 0.4      | 40.9%                       | 5.0                            | 0        | 0.0      | 0.0        | 0.0     |
| 129 |                         | 1        | 0.4      | 40.9%                       | 9.0                            | 0        | 0.0      | 0.0        | 0.0     |
| 130 |                         | 1        | 0.4      | 40.9%                       | 9.0                            | 0        | 0.0      | 0.0        | 0.0     |
| 131 |                         | 1        | 0.4      | 40.9%                       | 7.0                            | 0        | 0.0      | 0.0        | 0.0     |

| ID  | Name *             | Articles |          | Authorship weight (mean) | Keywords per article (mean) | Keywords |          | Centrality | Density |
|-----|--------------------|----------|----------|--------------------------|-----------------------------|----------|----------|------------|---------|
|     |                    | unique   | weighted |                          |                             | unique   | weighted |            |         |
| 132 |                    | 1        | 0.4      | 40.9%                    | 12.0                        | 0        | 0.0      | 0.0        | 0.0     |
| 133 |                    | 1        | 0.4      | 40.8%                    | 9.0                         | 0        | 0.0      | 0.0        | 0.0     |
| 134 | Rotavirus Vaccines | 0        | 0.0      |                          |                             | 9        | 0.4      | 27.1       | 0.0     |
| 135 | Social Medicine    | 0        | 0.0      |                          |                             | 3        | 0.4      | 10.5       | 0.0     |
| 136 | Critical Care      | 0        | 0.0      |                          |                             | 8        | 0.4      | 56.5       | 0.0     |
| 137 |                    | 1        | 0.4      | 36.0%                    | 12.0                        | 0        | 0.0      | 0.0        | 0.0     |
| 138 |                    | 1        | 0.4      | 36.0%                    | 16.0                        | 0        | 0.0      | 0.0        | 0.0     |
| 139 |                    | 1        | 0.4      | 36.0%                    | 10.0                        | 0        | 0.0      | 0.0        | 0.0     |
| 140 |                    | 1        | 0.4      | 36.0%                    | 5.0                         | 0        | 0.0      | 0.0        | 0.0     |
| 141 |                    | 1        | 0.4      | 36.0%                    | 15.0                        | 0        | 0.0      | 0.0        | 0.0     |
| 142 |                    | 1        | 0.4      | 36.0%                    | 11.0                        | 0        | 0.0      | 0.0        | 0.0     |
| 143 |                    | 1        | 0.4      | 36.0%                    | 14.0                        | 0        | 0.0      | 0.0        | 0.0     |
| 144 |                    | 1        | 0.4      | 36.0%                    | 4.0                         | 0        | 0.0      | 0.0        | 0.0     |
| 145 |                    | 1        | 0.4      | 36.0%                    | 6.0                         | 0        | 0.0      | 0.0        | 0.0     |
| 146 |                    | 1        | 0.4      | 36.0%                    | 12.0                        | 0        | 0.0      | 0.0        | 0.0     |
| 147 |                    | 1        | 0.4      | 36.0%                    | 15.0                        | 0        | 0.0      | 0.0        | 0.0     |
| 148 |                    | 1        | 0.4      | 36.0%                    | 16.0                        | 0        | 0.0      | 0.0        | 0.0     |
| 149 |                    | 1        | 0.4      | 36.0%                    | 4.0                         | 0        | 0.0      | 0.0        | 0.0     |
| 150 | Clinical Protocols | 0        | 0.0      |                          |                             | 9        | 0.4      | 93.9       | 0.0     |
| 151 | Bariatric Surgery  | 0        | 0.0      |                          |                             | 13       | 0.4      | 139.0      | 0.0     |
| 152 | Annexins           | 1        | 0.3      | 27.6%                    | 14.0                        | 4        | 0.1      | 3.7        | 5.7     |
| 153 | Sleep              | 0        | 0.0      |                          |                             | 14       | 0.4      | 99.5       | 0.0     |

| ID  | Name *                       | Articles |          | Authorship<br>weight (mean) | Keywords per<br>article (mean) | Keywords |          | Centrality | Density |
|-----|------------------------------|----------|----------|-----------------------------|--------------------------------|----------|----------|------------|---------|
|     |                              | unique   | weighted |                             |                                | unique   | weighted |            |         |
| 154 |                              | 1        | 0.4      | 35.4%                       | 17.0                           | 0        | 0.0      | 0.0        | 0.0     |
| 155 | Renal Dialysis               | 0        | 0.0      |                             |                                | 17       | 0.3      | 150.3      | 0.0     |
| 156 |                              | 1        | 0.3      | 32.8%                       | 7.0                            | 0        | 0.0      | 0.0        | 0.0     |
| 157 |                              | 1        | 0.3      | 32.8%                       | 14.0                           | 0        | 0.0      | 0.0        | 0.0     |
| 158 |                              | 1        | 0.3      | 32.8%                       | 9.0                            | 0        | 0.0      | 0.0        | 0.0     |
| 159 |                              | 1        | 0.3      | 32.8%                       | 18.0                           | 0        | 0.0      | 0.0        | 0.0     |
| 160 |                              | 1        | 0.3      | 32.8%                       | 8.0                            | 0        | 0.0      | 0.0        | 0.0     |
| 161 |                              | 1        | 0.3      | 32.8%                       | 10.0                           | 0        | 0.0      | 0.0        | 0.0     |
| 162 |                              | 1        | 0.3      | 32.8%                       | 18.0                           | 0        | 0.0      | 0.0        | 0.0     |
| 163 |                              | 1        | 0.3      | 32.8%                       | 13.0                           | 0        | 0.0      | 0.0        | 0.0     |
| 164 |                              | 1        | 0.3      | 32.8%                       | 13.0                           | 0        | 0.0      | 0.0        | 0.0     |
| 165 |                              | 1        | 0.3      | 30.9%                       | 16.0                           | 0        | 0.0      | 0.0        | 0.0     |
| 166 |                              | 1        | 0.3      | 30.6%                       | 13.0                           | 0        | 0.0      | 0.0        | 0.0     |
| 167 | Prisoners                    | 0        | 0.0      |                             |                                | 5        | 0.3      | 27.3       | 0.0     |
| 168 |                              | 1        | 0.3      | 28.9%                       | 10.0                           | 0        | 0.0      | 0.0        | 0.0     |
| 169 |                              | 1        | 0.3      | 28.9%                       | 11.0                           | 0        | 0.0      | 0.0        | 0.0     |
| 170 |                              | 1        | 0.3      | 28.9%                       | 13.0                           | 0        | 0.0      | 0.0        | 0.0     |
| 171 |                              | 1        | 0.3      | 28.9%                       | 14.0                           | 0        | 0.0      | 0.0        | 0.0     |
| 172 |                              | 1        | 0.3      | 28.9%                       | 13.0                           | 0        | 0.0      | 0.0        | 0.0     |
| 173 |                              | 1        | 0.3      | 28.9%                       | 15.0                           | 0        | 0.0      | 0.0        | 0.0     |
| 174 |                              | 1        | 0.3      | 28.9%                       | 13.0                           | 0        | 0.0      | 0.0        | 0.0     |
| 175 | Air Pollutants, Occupational | 0        | 0.0      |                             |                                | 18       | 0.3      | 112.1      | 0.0     |

| ID  | Name *                           | Articles |          | Authorship<br>weight (mean) | Keywords per<br>article (mean) | Keywords |          | Centrality | Density |
|-----|----------------------------------|----------|----------|-----------------------------|--------------------------------|----------|----------|------------|---------|
|     |                                  | unique   | weighted |                             |                                | unique   | weighted |            |         |
| 176 |                                  | 1        | 0.3      | 27.6%                       | 13.0                           | 0        | 0.0      | 0.0        | 0.0     |
| 177 |                                  | 1        | 0.3      | 26.5%                       | 18.0                           | 0        | 0.0      | 0.0        | 0.0     |
| 178 |                                  | 1        | 0.3      | 26.5%                       | 9.0                            | 0        | 0.0      | 0.0        | 0.0     |
| 179 |                                  | 1        | 0.3      | 25.6%                       | 11.0                           | 0        | 0.0      | 0.0        | 0.0     |
| 180 |                                  | 2        | 0.2      | 12.5%                       | 8.7                            | 0        | 0.0      | 0.0        | 0.0     |
| 181 |                                  | 1        | 0.2      | 24.8%                       | 14.0                           | 0        | 0.0      | 0.0        | 0.0     |
| 182 | Meditation                       | 0        | 0.0      |                             |                                | 6        | 0.2      | 42.5       | 0.0     |
| 183 |                                  | 1        | 0.2      | 24.2%                       | 21.0                           | 0        | 0.0      | 0.0        | 0.0     |
| 184 |                                  | 1        | 0.2      | 24.2%                       | 6.0                            | 0        | 0.0      | 0.0        | 0.0     |
| 185 | Seroepidemiologic Studies        | 0        | 0.0      |                             |                                | 11       | 0.2      | 76.2       | 0.0     |
| 186 |                                  | 1        | 0.2      | 23.1%                       | 14.0                           | 0        | 0.0      | 0.0        | 0.0     |
| 187 | Nitroimidazoles                  | 0        | 0.0      |                             |                                | 12       | 0.2      | 66.3       | 0.0     |
| 188 | Endemic Diseases                 | 0        | 0.0      |                             |                                | 5        | 0.2      | 27.6       | 0.0     |
| 189 | Health Human Resource Evaluation | 0        | 0.0      |                             |                                | 2        | 0.2      | 5.3        | 0.0     |
| 190 |                                  | 1        | 0.2      | 18.2%                       | 12.0                           | 0        | 0.0      | 0.0        | 0.0     |
| 191 |                                  | 1        | 0.2      | 18.2%                       | 11.0                           | 0        | 0.0      | 0.0        | 0.0     |
| 192 |                                  | 1        | 0.2      | 18.2%                       | 16.0                           | 0        | 0.0      | 0.0        | 0.0     |
| 193 | Herpes Zoster                    | 0        | 0.0      |                             |                                | 5        | 0.2      | 9.8        | 0.0     |
| 194 | Lumbosacral Region               | 1        | 0.1      | 12.0%                       | 7.0                            | 3        | 0.1      | 13.9       | 10.7    |
| 195 |                                  | 1        | 0.2      | 16.0%                       | 10.0                           | 0        | 0.0      | 0.0        | 0.0     |
| 196 |                                  | 1        | 0.2      | 16.0%                       | 8.0                            | 0        | 0.0      | 0.0        | 0.0     |
| 197 |                                  | 1        | 0.2      | 16.0%                       | 11.0                           | 0        | 0.0      | 0.0        | 0.0     |

| ID  | Name *             | Articles |          | Authorship weight (mean) | Keywords per article (mean) | Keywords |          | Centrality | Density |
|-----|--------------------|----------|----------|--------------------------|-----------------------------|----------|----------|------------|---------|
|     |                    | unique   | weighted |                          |                             | unique   | weighted |            |         |
| 198 |                    | 1        | 0.2      | 16.0%                    | 9.0                         | 0        | 0.0      | 0.0        | 0.0     |
| 199 |                    | 1        | 0.1      | 15.0%                    | 17.0                        | 0        | 0.0      | 0.0        | 0.0     |
| 200 |                    | 1        | 0.1      | 14.6%                    | 16.0                        | 0        | 0.0      | 0.0        | 0.0     |
| 201 |                    | 1        | 0.1      | 14.6%                    | 14.0                        | 0        | 0.0      | 0.0        | 0.0     |
| 202 |                    | 1        | 0.1      | 14.6%                    | 8.0                         | 0        | 0.0      | 0.0        | 0.0     |
| 203 |                    | 1        | 0.1      | 14.6%                    | 11.0                        | 0        | 0.0      | 0.0        | 0.0     |
| 204 |                    | 1        | 0.1      | 12.9%                    | 15.0                        | 0        | 0.0      | 0.0        | 0.0     |
| 205 |                    | 1        | 0.1      | 12.9%                    | 12.0                        | 0        | 0.0      | 0.0        | 0.0     |
| 206 | Nursing            | 0        | 0.0      |                          |                             | 3        | 0.1      | 7.3        | 0.0     |
| 207 |                    | 1        | 0.1      | 12.3%                    | 3.0                         | 0        | 0.0      | 0.0        | 0.0     |
| 208 |                    | 1        | 0.1      | 12.3%                    | 17.0                        | 0        | 0.0      | 0.0        | 0.0     |
| 209 |                    | 1        | 0.1      | 12.0%                    | 11.0                        | 0        | 0.0      | 0.0        | 0.0     |
| 210 |                    | 1        | 0.1      | 12.0%                    | 15.0                        | 0        | 0.0      | 0.0        | 0.0     |
| 211 |                    | 1        | 0.1      | 12.0%                    | 7.0                         | 0        | 0.0      | 0.0        | 0.0     |
| 212 |                    | 1        | 0.1      | 12.0%                    | 9.0                         | 0        | 0.0      | 0.0        | 0.0     |
| 213 |                    | 1        | 0.1      | 11.8%                    | 14.0                        | 0        | 0.0      | 0.0        | 0.0     |
| 214 | Social Work        | 0        | 0.0      |                          |                             | 2        | 0.1      | 4.5        | 0.0     |
| 215 | Sedentary Behavior | 0        | 0.0      |                          |                             | 2        | 0.1      | 8.9        | 0.0     |
| 216 |                    | 1        | 0.1      | 10.9%                    | 7.0                         | 0        | 0.0      | 0.0        | 0.0     |
| 217 |                    | 1        | 0.1      | 10.9%                    | 11.0                        | 0        | 0.0      | 0.0        | 0.0     |
| 218 |                    | 1        | 0.1      | 10.9%                    | 10.0                        | 0        | 0.0      | 0.0        | 0.0     |
| 219 |                    | 1        | 0.1      | 10.9%                    | 14.0                        | 0        | 0.0      | 0.0        | 0.0     |

| ID  | Name *                        | Articles |          | Authorship<br>weight (mean) | Keywords per<br>article (mean) | Keywords |          | Centrality | Density |
|-----|-------------------------------|----------|----------|-----------------------------|--------------------------------|----------|----------|------------|---------|
|     |                               | unique   | weighted |                             |                                | unique   | weighted |            |         |
| 220 | Social Participation          | 0        | 0.0      |                             |                                | 2        | 0.1      | 4.8        | 0.0     |
| 221 | Environmental Pollution       | 0        | 0.0      |                             |                                | 4        | 0.1      | 18.8       | 0.0     |
| 222 | Diseases Registries           | 0        | 0.0      |                             |                                | 1        | 0.1      | 0.3        | 0.0     |
| 223 |                               | 1        | 0.1      | 10.2%                       | 8.0                            | 0        | 0.0      | 0.0        | 0.0     |
| 224 | Esophageal Motility Disorders | 0        | 0.0      |                             |                                | 3        | 0.1      | 3.8        | 0.0     |
| 225 |                               | 1        | 0.1      | 9.6%                        | 10.0                           | 0        | 0.0      | 0.0        | 0.0     |
| 226 |                               | 1        | 0.1      | 9.6%                        | 18.0                           | 0        | 0.0      | 0.0        | 0.0     |
| 227 |                               | 1        | 0.1      | 9.6%                        | 9.0                            | 0        | 0.0      | 0.0        | 0.0     |
| 228 | Intimate Partner Violence     | 0        | 0.0      |                             |                                | 2        | 0.1      | 10.2       | 0.0     |
| 229 |                               | 1        | 0.1      | 9.2%                        | 10.0                           | 0        | 0.0      | 0.0        | 0.0     |
| 230 |                               | 1        | 0.1      | 9.2%                        | 16.0                           | 0        | 0.0      | 0.0        | 0.0     |
| 231 |                               | 1        | 0.1      | 8.8%                        | 13.0                           | 0        | 0.0      | 0.0        | 0.0     |
| 232 |                               | 1        | 0.1      | 8.8%                        | 13.0                           | 0        | 0.0      | 0.0        | 0.0     |
| 233 |                               | 1        | 0.1      | 8.8%                        | 14.0                           | 0        | 0.0      | 0.0        | 0.0     |
| 234 |                               | 1        | 0.1      | 8.8%                        | 5.0                            | 0        | 0.0      | 0.0        | 0.0     |
| 235 |                               | 1        | 0.1      | 8.8%                        | 14.0                           | 0        | 0.0      | 0.0        | 0.0     |
| 236 |                               | 1        | 0.1      | 8.2%                        | 11.0                           | 0        | 0.0      | 0.0        | 0.0     |
| 237 |                               | 1        | 0.1      | 8.2%                        | 11.0                           | 0        | 0.0      | 0.0        | 0.0     |
| 238 |                               | 1        | 0.1      | 7.7%                        | 12.0                           | 0        | 0.0      | 0.0        | 0.0     |
| 239 |                               | 1        | 0.1      | 7.7%                        | 11.0                           | 0        | 0.0      | 0.0        | 0.0     |
| 240 |                               | 1        | 0.1      | 7.7%                        | 12.0                           | 0        | 0.0      | 0.0        | 0.0     |
| 241 |                               | 1        | 0.1      | 7.7%                        | 6.0                            | 0        | 0.0      | 0.0        | 0.0     |

| ID  | Name *               | Articles |          | Authorship<br>weight (mean) | Keywords per<br>article (mean) | Keywords |          | Centrality | Density |
|-----|----------------------|----------|----------|-----------------------------|--------------------------------|----------|----------|------------|---------|
|     |                      | unique   | weighted |                             |                                | unique   | weighted |            |         |
| 242 | Antipsychotic Agents | 0        | 0.0      |                             |                                | 5        | 0.1      | 15.2       | 0.0     |
| 243 |                      | 1        | 0.1      | 7.4%                        | 12.0                           | 0        | 0.0      | 0.0        | 0.0     |
| 244 |                      | 1        | 0.1      | 7.3%                        | 20.0                           | 0        | 0.0      | 0.0        | 0.0     |
| 245 |                      | 1        | 0.1      | 7.3%                        | 7.0                            | 0        | 0.0      | 0.0        | 0.0     |
| 246 |                      | 1        | 0.1      | 6.8%                        | 12.0                           | 0        | 0.0      | 0.0        | 0.0     |
| 247 |                      | 1        | 0.1      | 6.4%                        | 9.0                            | 0        | 0.0      | 0.0        | 0.0     |
| 248 |                      | 1        | 0.1      | 6.3%                        | 11.0                           | 0        | 0.0      | 0.0        | 0.0     |
| 249 | Leptospirosis        | 0        | 0.0      |                             |                                | 1        | 0.1      | 0.3        | 0.0     |
| 250 |                      | 1        | 0.1      | 5.9%                        | 18.0                           | 0        | 0.0      | 0.0        | 0.0     |
| 251 | Anti-HIV Agents      | 0        | 0.0      |                             |                                | 2        | 0.1      | 18.2       | 0.0     |
| 252 |                      | 1        | 0.1      | 5.5%                        | 7.0                            | 0        | 0.0      | 0.0        | 0.0     |
| 253 |                      | 1        | 0.1      | 5.5%                        | 13.0                           | 0        | 0.0      | 0.0        | 0.0     |
| 254 |                      | 1        | 0.1      | 5.5%                        | 9.0                            | 0        | 0.0      | 0.0        | 0.0     |
| 255 |                      | 1        | 0.1      | 5.5%                        | 9.0                            | 0        | 0.0      | 0.0        | 0.0     |
| 256 | Cholecystitis        | 0        | 0.0      |                             |                                | 2        | 0.0      | 1.9        | 0.0     |
| 257 |                      | 1        | 0.0      | 4.6%                        | 13.0                           | 0        | 0.0      | 0.0        | 0.0     |
| 258 | Botulism             | 0        | 0.0      |                             |                                | 2        | 0.0      | 0.3        | 0.0     |
| 259 | Jejunioileal Bypass  | 0        | 0.0      |                             |                                | 1        | 0.0      | 7.7        | 0.0     |
| 260 |                      | 1        | 0.0      | 3.9%                        | 15.0                           | 0        | 0.0      | 0.0        | 0.0     |
| 261 |                      | 1        | 0.0      | 3.8%                        | 15.0                           | 0        | 0.0      | 0.0        | 0.0     |
| 262 |                      | 1        | 0.0      | 3.7%                        | 14.0                           | 0        | 0.0      | 0.0        | 0.0     |
| 263 | Cesium Radioisotopes | 0        | 0.0      |                             |                                | 2        | 0.0      | 1.7        | 0.0     |

| ID           | Name *                           | Articles |          | Authorship<br>weight (mean) | Keywords per<br>article (mean) | Keywords |          | Centrality | Density |
|--------------|----------------------------------|----------|----------|-----------------------------|--------------------------------|----------|----------|------------|---------|
|              |                                  | unique   | weighted |                             |                                | unique   | weighted |            |         |
| 264          | Geographic Mapping               | 0        | 0.0      |                             |                                | 1        | 0.0      | 1.5        | 0.0     |
| 265          | Anemia, Sickle Cell              | 0        | 0.0      |                             |                                | 2        | 0.0      | 5.1        | 0.0     |
| 266          | Consensus Development Conference | 0        | 0.0      |                             |                                | 1        | 0.0      | 1.1        | 0.0     |
| 267          | Weight Perception                | 0        | 0.0      |                             |                                | 1        | 0.0      | 3.2        | 0.0     |
| 268          | Deltaretrovirus Infections       | 0        | 0.0      |                             |                                | 1        | 0.0      | 1.0        | 0.0     |
| <b>Total</b> |                                  | 1903     | 576.5    | 30.3%                       | 8.9                            | 3222     | 576.5    |            | 37.1    |

Authorship weight is the share of family and community physicians in Brazil among authors, with harmonic authorship counting. Authorship weighing is used for the “weighted” number of articles and keywords, as well as for the mean number of keywords per article. \* Research themes without a name are those with no keywords.



Suppl. Table 2 – Postgraduate trajectories of family and community physicians leading to articles, by research theme

| Characteristic         | Primary Health Care |       |       |       | Animals |       | Total |       |
|------------------------|---------------------|-------|-------|-------|---------|-------|-------|-------|
|                        | Humans              |       |       |       |         |       |       |       |
| Gender *               |                     |       |       |       |         |       |       |       |
| Female                 | 95.2                | 35.3% | 59.7  | 31.1% | 16.5    | 60.7% | 205.3 | 35.8% |
| Male                   | 174.7               | 64.7% | 132.2 | 68.9% | 10.7    | 39.3% | 367.6 | 64.2% |
| Mode of specialization |                     |       |       |       |         |       |       |       |
| Certification          | 70.5                | 26.0% | 61.7  | 31.7% | 11.7    | 42.9% | 169.8 | 29.4% |
| Medical residency      | 200.6               | 74.0% | 132.9 | 68.3% | 15.5    | 57.1% | 407.7 | 70.6% |
| Knowledge area         |                     |       |       |       |         |       |       |       |
| None                   | 39.9                | 14.7% | 37.9  | 19.5% | 2.6     | 9.6%  | 97.7  | 16.9% |
| Medicine               | 110.4               | 40.7% | 26.6  | 13.7% | 10.0    | 36.7% | 179.2 | 31.0% |
| Collective health      | 81.7                | 30.1% | 80.2  | 41.2% | 2.4     | 8.7%  | 191.3 | 33.1% |
| Other                  | 39.1                | 14.4% | 49.9  | 25.6% | 12.2    | 45.0% | 109.3 | 18.9% |
| Postgraduate degree    |                     |       |       |       |         |       |       |       |
| None                   | 39.9                | 14.7% | 37.9  | 19.5% | 2.6     | 9.6%  | 97.7  | 16.9% |
| Master's               | 75.6                | 27.9% | 80.6  | 41.4% | 3.3     | 12.0% | 183.9 | 31.8% |
| PhD                    | 155.6               | 57.4% | 76.1  | 39.1% | 21.3    | 78.4% | 296.0 | 51.3% |
| Year of publication    |                     |       |       |       |         |       |       |       |
| 1985–1998              | 16.4                | 6.1%  | 6.2   | 3.2%  | 0.8     | 2.8%  | 28.8  | 5.0%  |
| 1999–2003              | 17.1                | 6.3%  | 1.9   | 1.0%  | 1.3     | 4.8%  | 23.8  | 4.1%  |
| 2004–2008              | 50.3                | 18.6% | 25.9  | 13.3% | 6.2     | 22.9% | 94.8  | 16.4% |
| 2009–2013              | 80.8                | 29.8% | 77.8  | 40.0% | 5.6     | 20.5% | 191.2 | 33.1% |
| 2014–2018              | 106.4               | 39.3% | 82.8  | 42.6% | 13.3    | 49.1% | 239.0 | 41.4% |

Frequencies are weighted by harmonic authorship counting. \* It was not possible to infer the gender of 16 family and community physicians, who authored 4.5 (0.8%) articles with weighing.
